# Supplementary material for: Multiple-Purpose Connectivity Map Analysis Reveals the Benefits of Esculetin to Hyperuricemia and Renal Fibrosis
Source: MDPI journal article supplement (doi:10.3390/ijms21207695), 2020-10-18
Supplement: s1 [file s1]

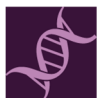

*Supplementary Materials*

# Multiple-purpose Connectivity Map Analysis Reveals the Benefits of Esculetin to Hyperuricemia and Renal Fibrosis

Yiming Wang <sup>1,†</sup>, Weikaixin Kong <sup>2,3,†</sup>, Liang Wang <sup>1</sup>, Tianyu Zhang <sup>2</sup>, Boyue Huang <sup>1</sup>, Jia Meng <sup>1</sup>, Baoxue Yang <sup>1</sup>, Zhengwei Xie <sup>2,\*</sup> and Hong Zhou <sup>1,\*</sup>

<sup>1</sup> Department of Pharmacology and Department of the Integration of Chinese and Western Medicine, School of Basic Medical Sciences, Peking University Health Science Center, Beijing 100191, China; wangyiming931211@163.com (Y.W.); wangliang94@bjmu.edu.cn (L.W.); boyueyue960521@126.com (B.H.); mengjia\_2011@pku.edu.cn (J.M.); baoxue@bjmu.edu.cn (B.Y.)

<sup>2</sup> Peking University International Cancer Institute, Peking University Health Science Center, Beijing 100191, China; zty@uw.edu

<sup>3</sup> Department of Molecular and Cellular Pharmacology, School of Pharmaceutical Sciences, Peking University Health Science Center, Beijing 100191, China; 1510307407@pku.edu.cn

\* Correspondence: xiezhengwei@hsc.pku.edu.cn (Z.X.); rainbow\_zhou@126.com (H.Z.); Tel.: +86-10-82802798 (Z.X.); +86-10-82802798 (H.Z.)

† These authors equally contributed to this work.

Received: 23 August 2020; Accepted: 3 October 2020; Published: 18 October 2020

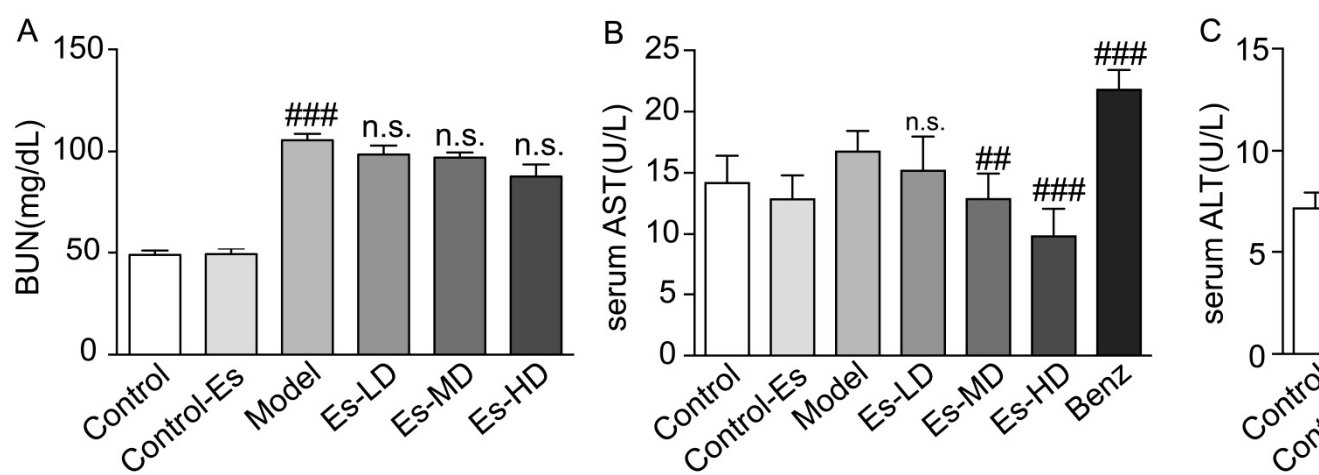

**Figure S1.** (A) Serum urea nitrogen levels in HUA model mice. (B) Serum AST. (C) Serum ALT. Mean  $\pm$  SD (n=6). n.s., not significant.

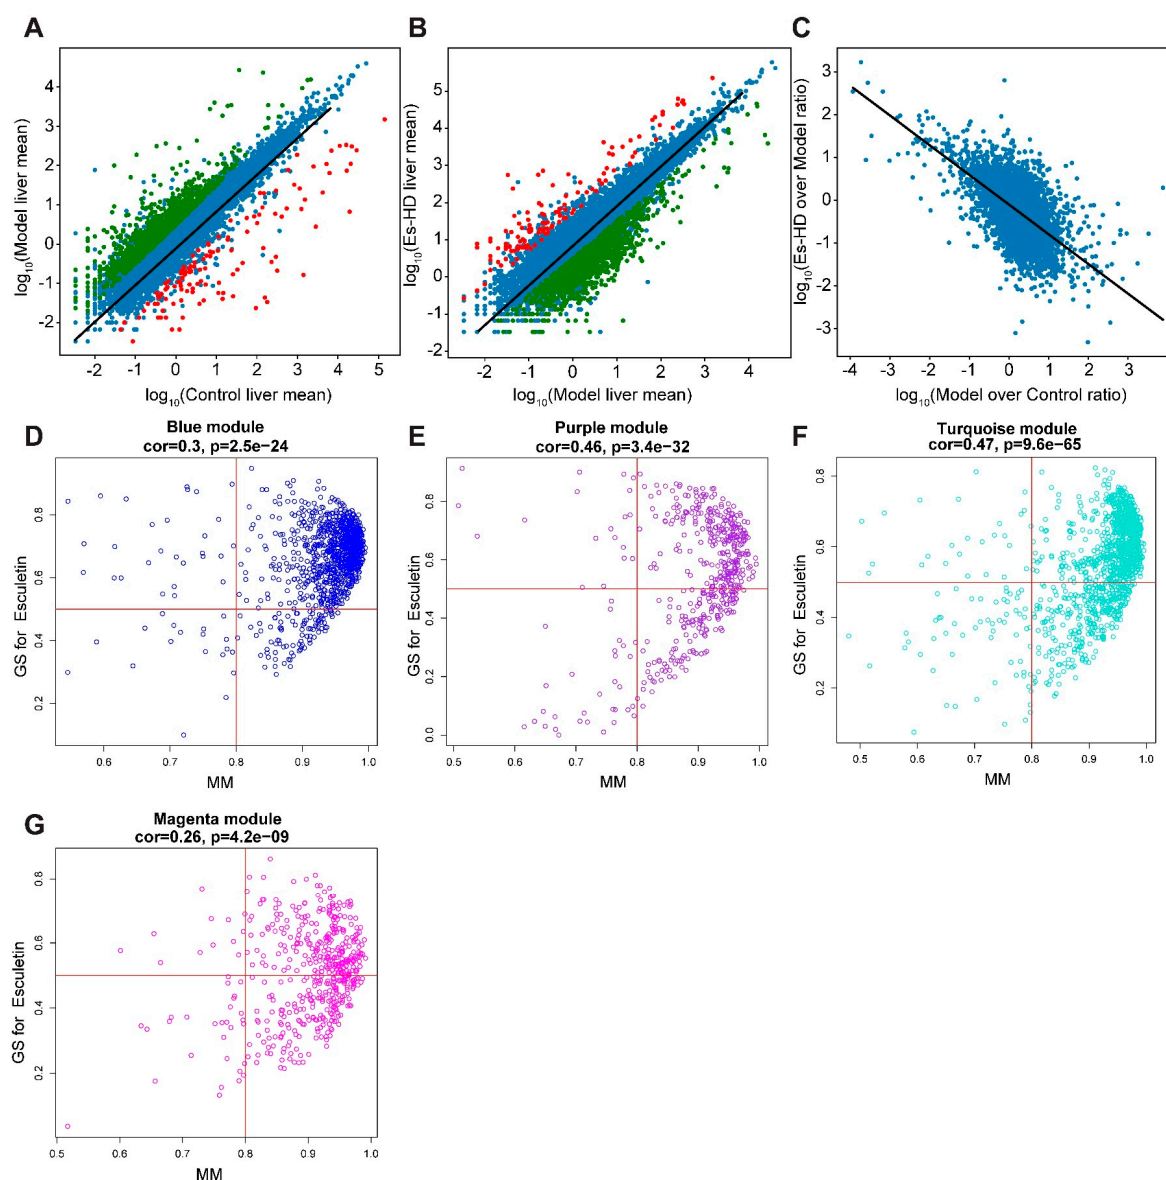

**Figure S2.** RNA-seq analysis reveals transcriptional reversion by esculetin in liver. The function of the gene was analyzed. (A) Scatter plots of gene expression in mice of the Model group vs the Control group. Black line:  $y=x$  line. (B) Scatter plot of gene expression in the mouse model group vs Es-HD. Red (green) dots shows genes that were down- (up-) regulated by 100 fold (A) which were reversed following esculetin treatment (B). Black line:  $y=x$  line. (C) Scatter plots of the Model over Control ratios vs Es-HD over the model group in the log10 scale. The changes in the ratios indicated a perfect restoration. (D) Blue module gene correlation scatter plots. X-axis represents the molecule membership (MM), i.e. the Pearson's correlation coefficient of the gene and module. Y-axis represents the genetic significance (GS) for the phenotype, i.e. the Pearson's correlation coefficient of the gene and phenotype (phenotype is represented by a Boolean variable). (E) Purple module gene correlation scatter plots. (F) Turquoise module gene correlation scatter plots. (G) Magenta module gene correlation scatter plots.

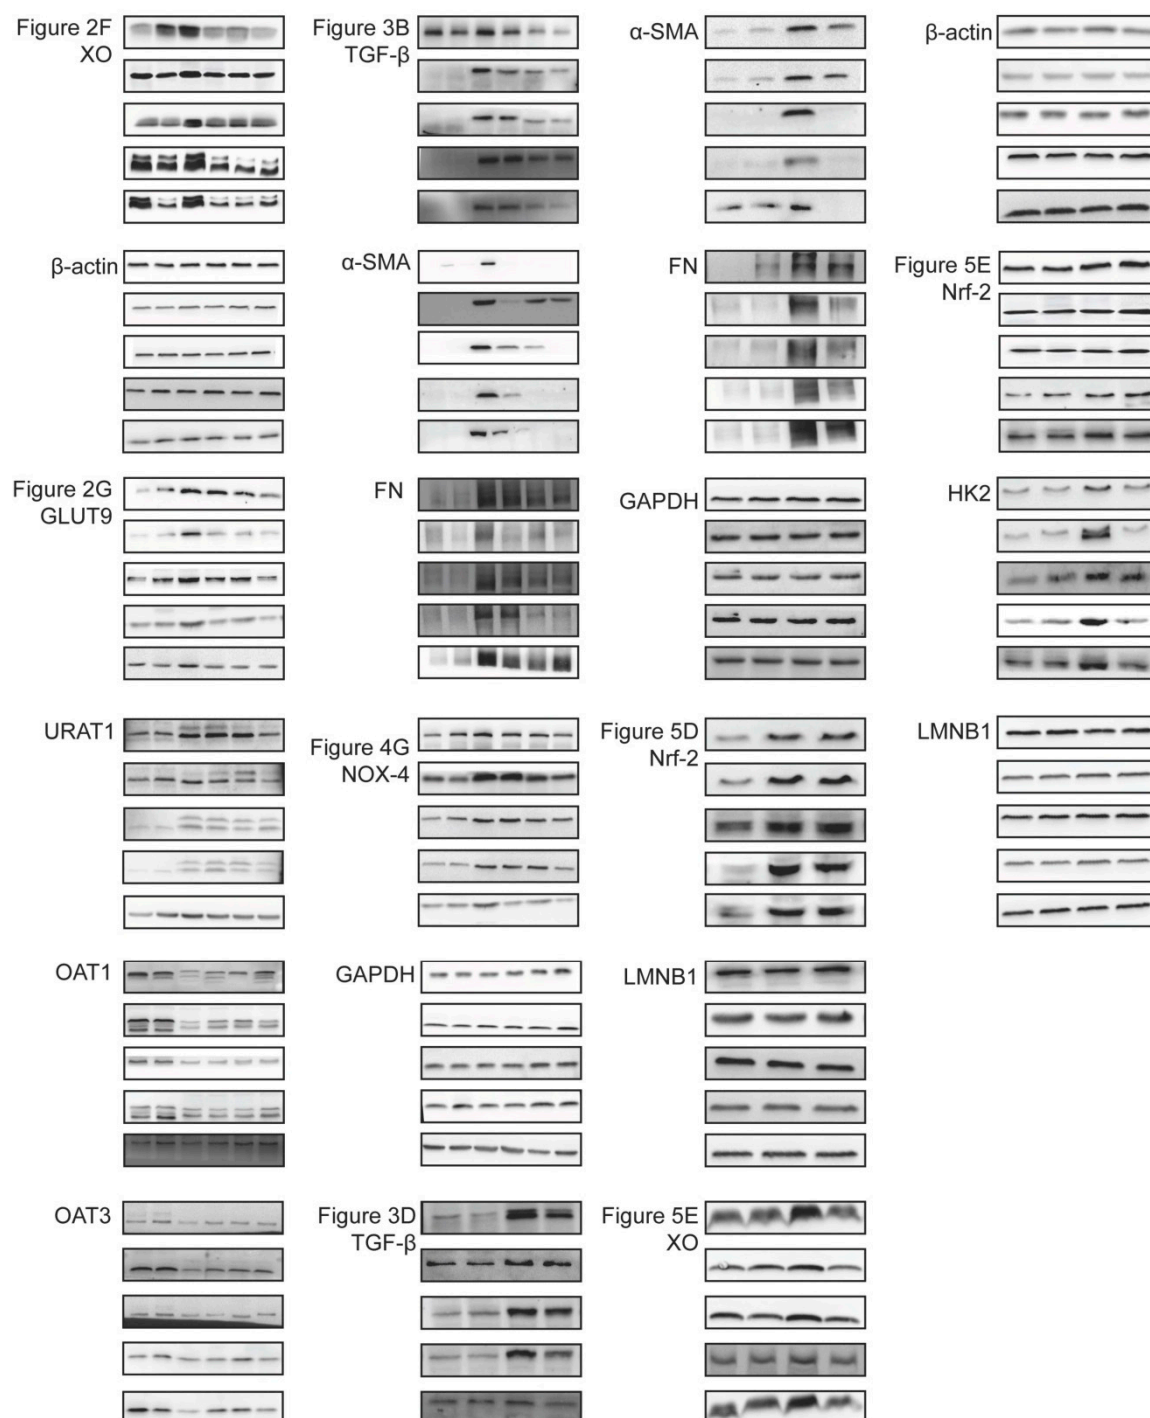

**Figure S3.** All results of Western blot.
